# Supplementary material
Source: ML conference proceedings conference paper supplement (https://openreview.net/forum?id=XqGsMD6KH5)
Supplement: supplementary_material [file attachment]

# SUPPLEMENTAL MATERIAL

## Anonymous authors

Paper under double-blind review

## 1 SOFTWARE AND HARDWARE

All model-dataset pairs are trained and evaluated on the workstation installed with NVIDIA RTX A5000 24 Gb. All the experiments are conducted under the same virtual Python environment. More details can be found in the repository <https://github.com/qz1408011458/MultiHot-Embedding-in-Tabular-Learning>.

## 2 DATA

Table 1: Datasets description. # Train, # Validation, and # Test respectively denote how many samples are used in the three datasets. # Num and # Cat represent the numbers of numerical features and categorical features.

| Name               | Abbr | # Train | # Validation | # Test | # Num | # Cat | Task type  | Batch size |
|--------------------|------|---------|--------------|--------|-------|-------|------------|------------|
| California Housing | CA   | 13209   | 3303         | 4128   | 8     | 0     | Regression | 256        |
| Adult              | AT   | 26048   | 6513         | 16281  | 6     | 8     | Binclass   | 256        |
| Helena             | HE   | 41724   | 10432        | 13040  | 27    | 0     | Multiclass | 512        |
| Jannis             | JA   | 53588   | 13398        | 16747  | 54    | 0     | Multiclass | 512        |
| Higgs Small        | HI   | 62752   | 15688        | 19610  | 28    | 0     | Binclass   | 512        |
| Year               | YE   | 370972  | 92743        | 51630  | 90    | 0     | Regression | 1024       |

## 3 HYPERPARAMETER SEARCHING

The structures and hyper-parameters of backbones MLP and ResNet are both referred to the best benchmarks of Gorishniy et al. (2021) (i.e., MLP+STD and ResNet+STD). We use grid searching to train models with multiple hyper-parameter combinations and select the best ones evaluated in testset. The parameter searching settings of feature representation methods are shown in the table 2 and the best hyper-parameters for the corresponding models are selected as presented in table 3.

Table 2: Grid searching settings.  $h$ ,  $K$  and  $m$  respectively denote embedding size, discretized bins and neighbors that are mentioned in our formal paper.  $\tau$  is the temperature coefficient which is a key hyper-parameter of the AD proposed in the Guo et al. (2021). Each triple in the table represents the lower bound, upper bound and searching step size.

|           | $h$        | $K$          | $m$        | $\tau$            |
|-----------|------------|--------------|------------|-------------------|
| MLP+OE    | (2, 30, 2) | (10, 200, 2) | NA         | NA                |
| MLP+AD    | (2, 30, 2) | (10, 200, 2) | NA         | (0.01, 0.5, 0.01) |
| MLP+MH    | (2, 30, 2) | (10, 200, 2) | (5, 40, 1) | NA                |
| ResNet+OE | (2, 30, 2) | (10, 200, 2) | NA         | NA                |
| ResNet+AD | (2, 30, 2) | (10, 200, 2) | NA         | (0.01, 0.5, 0.01) |
| ResNet+MH | (2, 30, 2) | (10, 200, 2) | (5, 40, 1) | NA                |

Table 3: The best hyper-parameters of the models evaluated in the paper.

|           | $h$ | $K$ | $m$ | $\tau$ |
|-----------|-----|-----|-----|--------|
| MLP+OE    | 20  | 40  | NA  | NA     |
| MLP+AD    | 20  | 100 | NA  | 0.05   |
| MLP+MH    | 2   | 192 | 7   | NA     |
| ResNet+OE | 20  | 60  | NA  | NA     |
| ResNet+AD | 20  | 100 | NA  | 0.05   |
| ResNet+MH | 2   | 190 | 24  | NA     |

## REFERENCES

- Yury Gorishniy, Ivan Rubachev, Valentin Khrulkov, and Artem Babenko. Revisiting deep learning models for tabular data. *Advances in Neural Information Processing Systems*, 34:18932–18943, 2021.
- Huifeng Guo, Bo Chen, Ruiming Tang, Weinan Zhang, Zhenguo Li, and Xiuqiang He. An embedding learning framework for numerical features in ctr prediction. In *Proceedings of the 27th ACM SIGKDD Conference on Knowledge Discovery and Data Mining, KDD '21*, pp. 2910–2918, New York, NY, USA, 2021. Association for Computing Machinery. doi: 10.1145/3447548.3467077. URL <https://doi.org/10.1145/3447548.3467077>.
